# Supplementary material
Source: publisher site journal article supplement (https://www.dovepress.com/article/361907)
Supplement: Supplementary file 1 [file get_supplementary_file.php]

# Supplementary file- 1

## Inclusion Criteria

Each subject met all of the following criteria to be enrolled in this study:

1. Male or female, age ≥ 18 years at the time of signing of an ICF
2. Confirmed and documented HIV-1 infection, treatment naïve, and eligible to receive Dolutegravir with Tenofovir and Lamivudine
3. Screening ECG without clinically significant abnormalities
4. Weight > 40 Kgs
5. Willing and able to provide written informed consent and agree to comply with protocol requirement
6. The subject has not been treated with any investigational drug or device within 30 days or 5 half-lives of an investigational drug, whichever is longer, of the screening visit
7. If female, the subject must be:
   1. Surgically sterilized via hysterectomy, bilateral oophorectomy, or bilateral tubal ligation; or
   2. Of childbearing potential and practicing an acceptable form of birth control (defined as the use of an intrauterine device; a barrier method, like a condom, with spermicide; any form of hormonal contraceptives; or abstinence from sexual intercourse) starting 60 days prior to dosing and continuing at least 90 days following the last treatment
   3. Of non-childbearing potential (i.e., postmenopausal for at least 1 year)
8. If male, the subject must be surgically or biologically sterile. If not sterile, the subject must agree to use an acceptable form of birth control with a sexual partner (as described in inclusion criteria #7b above) or abstain from sexual relations during the study period and up to 90 days following the last treatment dose

**Exclusion Criteria**

Subjects meeting any of the following criteria were excluded from the study:

1. Pregnant or nursing female
2. Previous or current AIDS-defining illness
3. Any uncontrolled opportunistic infection or malignancy
4. Absolute neutrophil count lower than 500 cells per μL
5. Platelet count lower than 50,000 cells per μL
6. Serum transaminases more than five times the upper limit of normal
7. Patients with Hemoglobin ≤ 7 g/dL or 4.34 mmol/L
8. Documented or known clinically-relevant drug or alcohol abuse within 12 months of screening
9. Subjects with renal impairment (eGFR <50 mL/min/1.73 m2)
10. Subjects on medicinal products which are contraindicated to be used with Dolutegravir, Tenofovir, and Lamivudine (other approved ARV drugs)
11. Subjects having arrhythmia, wherein administration of Dofetilide is required
12. History of clinically significant illness or any other major medical disorder that may interfere with subject treatment, assessment, or compliance with the protocol
13. History of a gastrointestinal disorder (or post-operative condition) that could interfere with the absorption of the study drug
14. History of difficulty with blood collection and/or poor venous access for the purposes of phlebotomy
15. Known hypersensitivity to the study investigational medicinal product, the metabolites, or formulation excipients, as applicable
16. The subject is unable to follow study instructions and comply with the protocol in the opinion of the investigator
17. Any other condition as per the physician’s discretion that would make the patient ineligible for the study

# Supplementary file- 2

## Schedule of Events: Safety and efficacy assessments

|  | **Screening (< 3 weeks)** | **Baseline (Day 1)** | **Week 4 (±2 days)** | **Week 8**  **(±4days)h** | **Week 12 (±4 days)** | **Week 18 (±4 days)h** | **Week 24 (±4 days)i** | **Safety FU Visit**  **Week 25 (±1 day)h** |
| --- | --- | --- | --- | --- | --- | --- | --- | --- |
| Informed consent | X |  |  |  |  |  |  |  |
| Demographics | X |  |  |  |  |  |  |  |
| Inclusion and exclusion criteria | X | X |  |  |  |  |  |  |
| Study Treatment |  | X | | | | | | |
| Medical history | X |  |  |  |  |  |  |  |
| Height | X |  |  |  |  |  |  |  |
| Weight | X | X | X |  | X |  | X |  |
| Physical examinationa | X | X | X |  | X |  | X |  |
| 12-Lead ECGb | X |  |  |  |  |  |  |  |
| Vital signs (HR, RR, BP, temperature)c | X | X | X |  | X |  | X |  |
| HIV RNA levels | X |  |  |  |  |  | X |  |
| Creatinine clearance | X |  |  |  | X |  | X |  |
| CD4 cell count | X |  |  |  |  |  | X |  |
| Pregnancy testd | X |  |  |  |  |  | X |  |
| Hematology and clinical chemistrye | X |  |  |  |  |  | X- |  |
| Urinalysisf | X |  |  |  | X |  | X |  |
| Concomitant medication | X | X | X | X | X | X | X | X |
| Adverse eventsg | X | X | X | X | X | X | X | X |
| Total cholesterol, HDL and LDL | X |  |  |  |  |  |  |  |
| Triglycerides | X |  |  |  |  |  |  |  |
| Dispense study treatment |  | X | X |  | X |  |  |  |
| Subject Diaryj |  | X | X |  | X |  | X |  |

a A physical examination includes the evaluation of general appearance, eyes, head and neck, abdomen, lymph nodes, skin, cardiovascular system, respiratory system, musculoskeletal system

b A standard 12-lead ECG was recorded after 5 minutes of rest in the supine position.

c Vital signs were measured by the Investigator or designee after 5 minutes of rest (sitting).

d Serum Pregnancy test was only required for females of childbearing potential at screening and Week 24. A urine pregnancy test should be performed during the course of the study if clinically indicated.

e Clinical chemistry: alanine aminotransferase, albumin, total protein, alkaline phosphatase, aspartate aminotransferase, glucose, calcium, chloride, cholesterol, creatinine, ɣ-glutamyl transferase, phosphate, potassium, sodium, total bilirubin, urea (blood urea nitrogen), Prothrombin, INR. Hematology: Hematocrit, hemoglobin, mean corpuscular volume, mean corpuscular hemoglobin, mean corpuscular hemoglobin concentration, platelet count, red blood cell count, white blood cell count with a differential count.

f Complete urinalysis (dipstick analysis): Blood, urobilinogen, ketones, glucose, protein, and urine microscopy

g AEs were monitored continuously during the study and were recorded in the CRF at each study visit, i.e., from the time the informed consent form was signed until Week 24. All AEs should be followed until resolution or deemed stable or until the event was due to another known cause (concurrent condition or medication). The clinical judgment indicates that further evaluation was not warranted. Should an Investigator be made aware of any serious AE (SAE) occurring any time after the active reporting period, the SAE (in case of reasonable causality) must be reported to Mylan within 24 hours.

h Telephonic follow-up was performed at Week 8, 18, and Week 25. The study team checked for any adverse events, concomitant medications, and compliance to study medication.

i Additional (unscheduled) follow-up visits were conducted for subjects with unresolved SAEs, AEs, or laboratory abnormalities who discontinued trial participation. If there were any unscheduled visits occurring during the study, the details of the visit were captured in the CRF

j Subject diary was provided at the baseline visit, site team reviewed the diary for drug compliance at every site visit (Week 4, 12, and 24)

# Supplementary file- 3

## Details of the IEC and/or institutional review boards approving the study

| **S. No.** | **Name of Committee** | **Institution Name** | **Date of Approval** |
| --- | --- | --- | --- |
| 1 | Sahyadri hospital Ltd. Ethics Committee. | Sahyadri Super Specialty Hospital | 18 Jan 2019 |
| 2 | Kanoria Ethics Committee | Kanoria Hospital and Research Centre | 23 Feb 2019 |
| 3 | Institutional Ethics Committee, Deenanath Mangeshkar Hospital | Deenanath Mangeshkar Hospital | 04 Apr 2019 |
| 4 | Institutional Ethics Committee, Rajiv Gandhi Institute of Medical Sciences & RIMS Govt. General Hospital | Rajiv Gandhi Institute of Medical Sciences and RIMS Government General Hospital | 28 Feb 2019 |
| 5 | Institutional Ethics Committee, Poona hospital and Research Centre | Poona Hospital and Research Centre | 24 Apr 2019 |
| 6 | Ethics Committee of CIMS Hospital | Care Institute of Medical Sciences (CIMS) Hospital | 08 Apr.2019 |
| 7 | Institutional Ethics committee, Guntur Medical College and Govt. General Hospital | Guntur Government General Hospital | 14 Mar 2019 |
| 8 | Institutional Ethics Committee, LMH | Lata Mangeshkar Multi Specialty Hospital | 07 Mar 2019 |
| 9 | MAHE Ethics Committee, Kasturba Medical College Hospital | Kasturba Medical College Hospital | 11 Jun 2019 |
| 10 | Institutional Ethics Committee, Government Medical, College & Hospital, Nagpur | Government Medical College & Hospital | 01 Jun 2019 |
| 11 | Institutional Ethics Committee, Maulana Azad Medical College | Maulana Azad Medical College and Associated Lok Nayak | 27 May 2019 |
| 12 | People Tree Hospitals Ethics Committee | People Tree Hospital 2 | 30 Jan 2019 |
| 13 | Institutional Ethics Committee-Anu Hospitals | Anu Hospitals | 08 Mar 2019 |
| 14 | Institutional Ethics Committee, KLE University | KLES DR Prabhakar Kore Hospital and MRC | 26 Jun 2019 |
